# Supplementary material for: Bioaccumulation and biotransformation of simvastatin in probiotic bacteria: A step towards better understanding of drug-bile acids-microbiome interactions
Source: PubMed Central journal article supplement (PMC9946981; doi:10.3389/fphar.2023.1111115), 2023-02-09
Supplement: Image1.pdf [file Image1.pdf]

## Supplementary Material

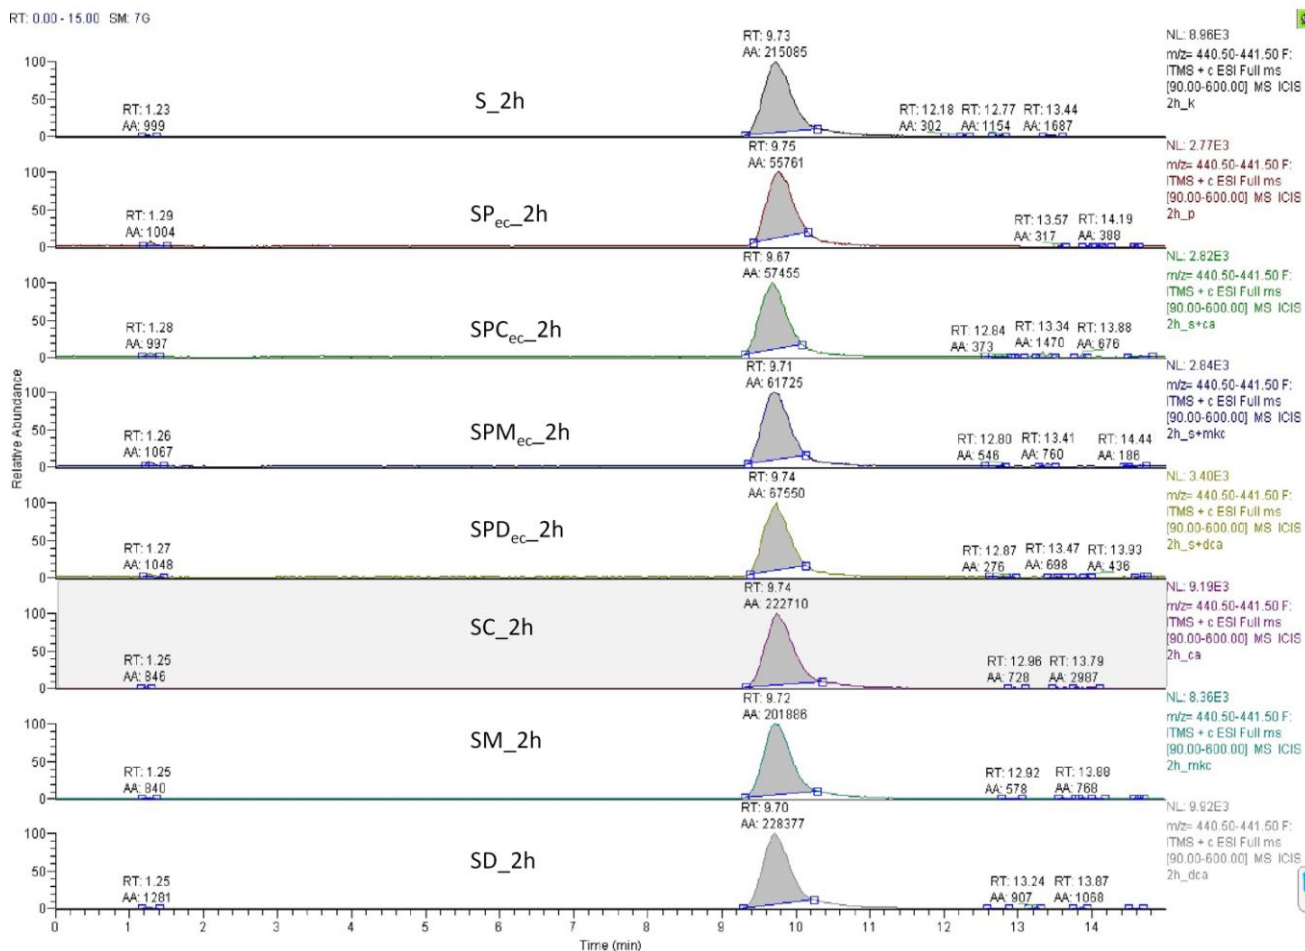

**Supplementary Figure 1.** LC-MS chromatograms of simvastatin samples after 2h of incubation in extracellular medium with probiotic bacteria and bile acids (S<sub>2h</sub>-simvastatin in buffer, SP<sub>ec</sub><sub>2h</sub>- extracellular concentration with probiotic bacteria, SPC<sub>ec</sub><sub>2h</sub>- extracellular concentration with probiotic bacteria and CA, SPM<sub>ec</sub><sub>2h</sub>- extracellular concentration with probiotic bacteria and MKC, SPD<sub>ec</sub><sub>2h</sub>- extracellular concentration with probiotic bacteria and DCA, SC<sub>2h</sub>- concentration with CA, SM<sub>2h</sub>- concentration with MKC, SD<sub>2h</sub>- concentration with DCA )
