# Supplementary material for: Bioaccumulation and biotransformation of simvastatin in probiotic bacteria: A step towards better understanding of drug-bile acids-microbiome interactions
Source: PubMed Central journal article supplement (PMC9946981; doi:10.3389/fphar.2023.1111115), 2023-02-09
Supplement: Image3.pdf [file Image3.pdf]

## Supplementary Material

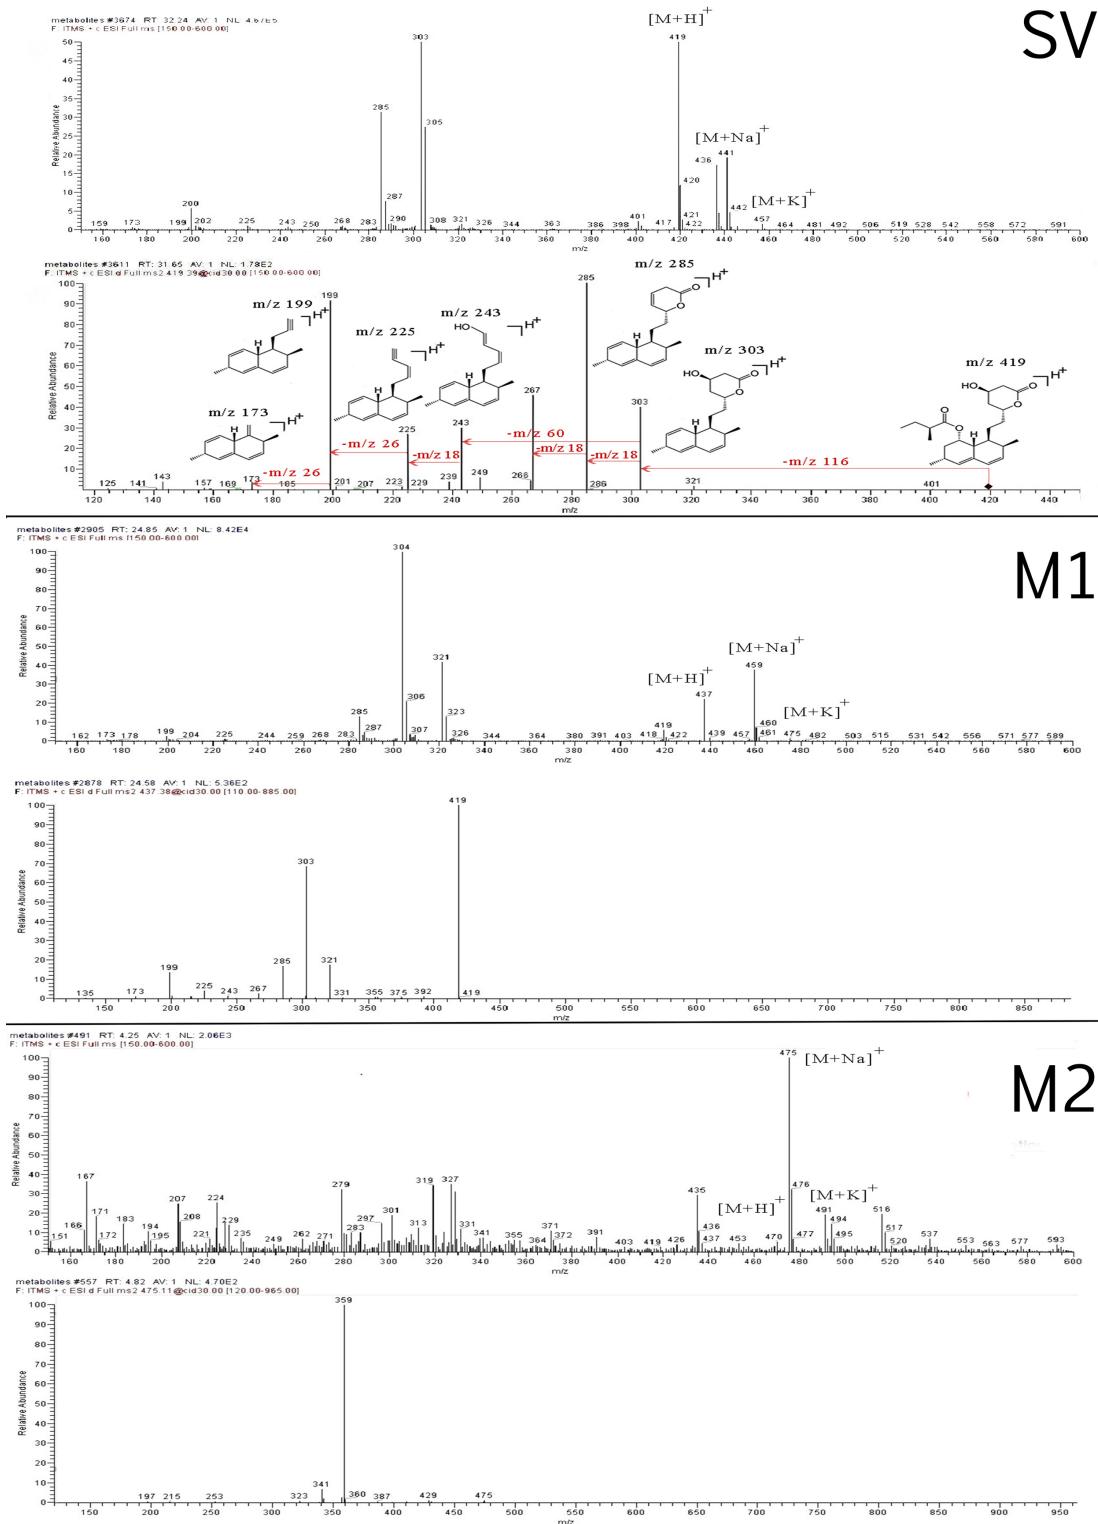

Supplementary Figure 3. The relevant ms1 and MS/MS spectra of simvastatin and its metabolites
